# Supplementary material for: SSU1 Checkup, a Rapid Tool for Detecting Chromosomal Rearrangements Related to the SSU1 Promoter in Saccharomyces cerevisiae: An Ecological and Technological Study on Wine Yeast
Source: PubMed Central journal article supplement (PMC7336578; doi:10.3389/fmicb.2020.01331), 2020-06-29
Supplement: Image_4.pdf [file Image_4.pdf]

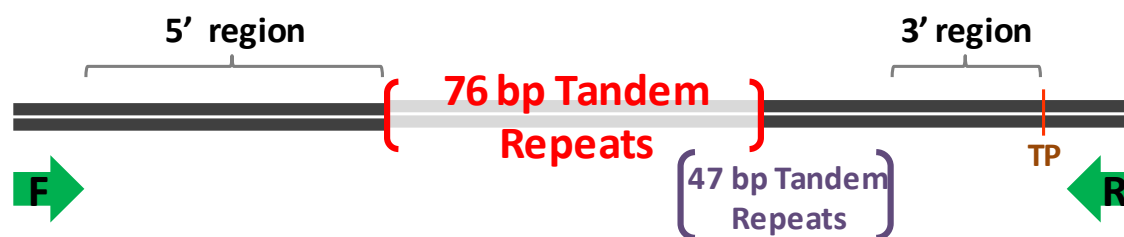

| Alleles    | Size (bp) | 5' region (bp) <sup>1</sup> | Number of Tandem Repeats |       | 3' region (bp) <sup>2</sup> |
|------------|-----------|-----------------------------|--------------------------|-------|-----------------------------|
|            |           |                             | 76 bp                    | 47 bp |                             |
| VIII-t-XVI | 388       | 141                         | 2                        | 1     | 36                          |
| VIII-t-XVI | 631       | 141                         | 5                        | 1     | 37                          |
| VIII-t-XVI | 478       | 141                         | 3                        | 1     | 37                          |
| VIII-t-XVI | 555       | 141                         | 4                        | 1     | 37                          |
| VIII       | 615       | 141                         | 1                        | 1     | 48                          |
| VIII       | 651       | 141                         | 1                        | 2     | 37                          |
| VIII       | 649       | 141                         | 1                        | 2     | 37                          |
| VIII       | 604       | 141                         | 1                        | 1     | 37                          |
| VIII       | 667       | 141                         | 2                        | 1     | 37                          |

<sup>1</sup> Length in bp from the end of the forward primer to the beginning of the 76 bp Tandem Repeats.

<sup>2</sup> Length in bp from the end of the 47 bp Tandem Repeats to the translocation point.

*Legend to Figure S4.*

Schematic representation of a VIII allele of *S. cerevisiae*. The figure shows the location of the 76 bp Tandem(s) and the 47 bp Tandem(s), as well as the translocation point (TP) and the upstream (5'; from the end of the forward primer to the beginning of the 76 bp Tandem) and downstream (3'; from the end of the 47 bp Tandem to the translocation point) flanking regions. The hybridization position for the primers forward (F; p1189) and reverse (R; either p1190 or p1194), are indicated.
